# Supplementary material for: Optimizing the Preparation of Silk Fibroin Nanoparticles and Their Loading with Polyphenols: Towards a More Efficient Anti-Inflammatory Effect on Macrophages
Source: MDPI journal article supplement (doi:10.3390/pharmaceutics15010263), 2023-01-12
Supplement: s1 [file s1]

# Optimizing the preparation of silk fibroin nanoparticles and their loading with polyphenols: towards a more efficient anti-inflammatory effect on macrophages

Antonio José Ruiz-Alcaraz <sup>1,†</sup>, María Ángeles Núñez-Sánchez <sup>2,†</sup>, María Alejandra Asensio Ruiz <sup>3</sup>,  
 María Antonia Martínez-Sánchez <sup>1,2</sup>, Alba Oliva-Bolarín <sup>2</sup>, Teresa Martínez Martínez <sup>3</sup>,  
 José Julián Pérez Cuadrado <sup>3</sup>, Bruno Ramos-Molina <sup>2,\*</sup> and Antonio Abel Lozano-Pérez <sup>3,4,\*</sup>

<sup>1</sup> Department of Biochemistry, Molecular Biology B and Immunology, School of Medicine, University of Murcia, Regional Campus of International Excellence “Campus Mare Nostrum”, 30100 Murcia, Spain

<sup>2</sup> Obesity and Metabolism Laboratory, Biomedical Research Institute of Murcia (IMIB), 30120 Murcia, Spain

<sup>3</sup> Radiopharmacy Research Group, Biomedical Research Institute of Murcia (IMIB), 30120 Murcia, Spain

<sup>4</sup> Department of Biotechnology, Genomic and Plant Breeding, Murcian Institute for Agricultural and Environmental Research (IMIDA), 30150 Murcia, Spain

\* Correspondence: bruno.ramos@imib.es (B.R.-M.); abel@um.es (A.A.L.-P.)

† These authors contributed equally to this work.

## List of contents

**Table S1.** Calibration curves used for polyphenols quantification.

**Table S2.** Statistic parameters of silk fibroin nanoparticles precipitation reproducibility and repeatability of the precipitation

**Table S3.** Effect of irradiated SFN-PPh, non-irradiated SFN-PPh, and free compounds on cell viability of the human macrophage HL-60 differentiated cells.

**Table S4.** Effect of irradiated SFN-PPh, non-irradiated SFN-PPh, and free compounds on cytokine release (IL-6 and TNF- $\alpha$ ) of the human macrophage HL-60 differentiated cells measured by ELISA.

**Figure S1.** Photographs showing the effect of SFN/PPh ratio in the PLC of CUR, Q and RES under white light and UV-light ( $\lambda=365\text{nm}$ ). From left to right on each picture: SFN, PPh/SFN ratio 1:32, PPh/SFN ratio 1:16, PPh/SFN ratio 1:8, PPh/SFN ratio 1:4 and free PPh.

**Figure S2.** Photograph of the SFN-PPh stocks suspensions at  $10\text{ mg}\cdot\text{mL}^{-1}$  used for cell culture tests. From left to right in the picture: SFN, SFN-CUR, SFN-Q and SFN-RES.

**Figure S3.** FESEM images of the nanoparticles showing changes during sterilization by gamma irradiation. Scale bar= 400 nm.

**Figure S4.** ATR-FTIR Spectra of the prepared SFN-Q at different Q/SFN ratios: (a) Magnification of the region  $3600\text{--}2600\text{ cm}^{-1}$  (b) Magnification of the region  $950\text{--}900\text{ cm}^{-1}$ . (c) Peak resolution of the quercetin spectrum in the region  $1600\text{--}600\text{ cm}^{-1}$ . (d) Peak resolution of the SFN spectrum in the region  $1600\text{--}600\text{ cm}^{-1}$ .

**Table S1.** Calibration equations used for polyphenols quantification.

| PPh | Wavelength (nm) | Equation                              | R <sup>2</sup> |
|-----|-----------------|---------------------------------------|----------------|
| CUR | 495             | $Abs = 3,6724 \cdot [CUR]^a + 0,0059$ | 0.9986         |
| Q   | 405             | $Abs = 11.278 \cdot [Q]^a - 0.0094$   | 0.9924         |
| RES | 355             | $Abs = 2,319 \cdot [RES]^a + 0,0461$  | 0,9949         |

<sup>a</sup>Concentration of polyphenols expressed in mg·mL<sup>-1</sup>.

**Table S2.** Statistic parameters of silk fibroin nanoparticles precipitation reproducibility and repeatability of the precipitation.

| Parameter            | Z <sub>ave</sub> (d.nm) | PdI     | ζ (mV) |
|----------------------|-------------------------|---------|--------|
| Number of values     | 18                      | 18      | 18     |
| Minimum              | 139.4                   | 0.07300 | -31.20 |
| Maximum              | 149.3                   | 0.14600 | -23.60 |
| Range                | 9.9                     | 0.07300 | 7.60   |
| 10% Percentile       | 141.6                   | 0.08020 | -29.94 |
| 90% Percentile       | 148.9                   | 0.13970 | -24.23 |
| Mean                 | 145.1                   | 0.11060 | -27.71 |
| Std. Deviation       | 2.8                     | 0.01872 | 1.98   |
| Std. Error of Mean   | 0.6                     | 0.00441 | 0.46   |
| Lower 95% CI of mean | 143.7                   | 0.10120 | -28.70 |
| Upper 95% CI of mean | 146.5                   | 0.11990 | -26.73 |

**Table S3.** Effect of irradiated SFN-PPh, non-irradiated SFN-PPh, and free compounds on cell viability of the human macrophage HL-60 differentiated cells.

| PPh | Concentration ( $\mu\text{g}\cdot\text{mL}^{-1}$ ) | Irradiated SFN-PPh (%) | Non-irradiated SFN-PPh (%) | Free PPh (%)      | p-value |
|-----|----------------------------------------------------|------------------------|----------------------------|-------------------|---------|
| CUR | 16                                                 | 106.00 $\pm$ 9.00      | 79.00 $\pm$ 3.00           | 84.00 $\pm$ 4.00  | N.S.    |
|     | 80                                                 | 83.00 $\pm$ 3.00       | 67.00 $\pm$ 3.00           | 64.00 $\pm$ 3.00  | N.S.    |
| Q   | 16                                                 | 106.00 $\pm$ 11.00     | 110.00 $\pm$ 4.00          | 109.00 $\pm$ 6.00 | N.S.    |
|     | 80                                                 | 106.00 $\pm$ 7.00      | 114.00 $\pm$ 8.00          | 91.00 $\pm$ 4.00  | N.S.    |
| RES | 16                                                 | 109.00 $\pm$ 7.00      | 129.00 $\pm$ 2.00          | 87.00 $\pm$ 13.00 | N.S.    |
|     | 80                                                 | 33.00 $\pm$ 6.00       | 23.00 $\pm$ 2.00           | 23.00 $\pm$ 2.00  | N.S.    |

Data are presented as % of cell viability  $\pm$  SE of LPS-stimulated ( $0.1 \mu\text{g}\cdot\text{mL}^{-1}$ ) HL-60 differentiated cells in the presence of irradiated or non-irradiated SFN-PPh (-CUR, -Q, and -RES) and free compounds (CUR, Q and RES) at different concentrations (16 and  $80 \mu\text{g}\cdot\text{mL}^{-1}$ ) measured by MTT assays ( $n=3$ , three independent experiments performed in triplicate). Statistical differences were calculated using the two-way ANOVA test (considering  $p<0.05$  significant), followed by a Dunnet's post hoc analysis for multiple comparisons. All data presented are normalized compared to untreated cells (100% viability). LPS, lipopolysaccharide; SFN, Silk fibroin nanoparticles; PPh, polyphenol; SFN-CUR, SFN-curcumin loaded; SFN-Q, SFN-quercetin loaded; SFN-RES, SFN-resveratrol loaded; CUR, curcumin; Q, quercetin; RES, resveratrol; N.S., not significant.

**Table S4.** Effect of irradiated SFN-PPh, non-irradiated SFN-PPh, and free compounds on cytokine release (IL-6 and TNF- $\alpha$ ) of the human macrophage HL-60 differentiated cells measured by ELISA.

|     | IL-6                           |                              |                              |         | TNF- $\alpha$      |                        |                 |         |
|-----|--------------------------------|------------------------------|------------------------------|---------|--------------------|------------------------|-----------------|---------|
|     | Irradiated SFN-PPh             | Non-irradiated SFN-PPh       | Free PPh                     | p-value | Irradiated SFN-PPh | Non-irradiated SFN-PPh | Free PPh        | p-value |
| CUR | 0.26 $\pm$ 0.04                | 0.15 $\pm$ 0.028             | 0.61 $\pm$ 0.13              | N.S.    | 0.87 $\pm$ 0.03    | 0.73 $\pm$ 0.07        | 1.07 $\pm$ 0.11 | N.S.    |
| Q   | 0.17 $\pm$ 0.04                | 0.17 $\pm$ 0.04              | 0.18 $\pm$ 0.04              | N.S.    | 1.08 $\pm$ 0.11    | 1.17 $\pm$ 0.09        | 0.88 $\pm$ 0.12 | N.S.    |
| RES | 0.74 $\pm$ 0.05 <sup>a,b</sup> | 0.34 $\pm$ 0.02 <sup>b</sup> | 0.95 $\pm$ 0.10 <sup>a</sup> | 0.012   | 0.80 $\pm$ 0.18    | 0.58 $\pm$ 0.02        | 0.64 $\pm$ 0.06 | N.S.    |

Values are expressed as fold-change compared to the untreated cells. Data are presented as mean  $\pm$  SE of LPS-stimulated ( $0.1 \mu\text{g}\cdot\text{mL}^{-1}$ ) HL-60 differentiated cells in the presence of irradiated or non-irradiated SFN-PPh (-CUR, -Q, and -RES) and free compounds (CUR, Q and RES) at  $16 \mu\text{g}\cdot\text{mL}^{-1}$  measured by ELISA assays ( $n=3$ , three independent experiments performed in triplicate). Statistical differences were calculated using the two-way ANOVA test (considering  $p<0.05$  significant), followed by Dunnet's post hoc analysis for multiple comparisons. LPS, Lipopolysaccharide; IL-6, Interleukin 6; TNF- $\alpha$ , tumor necrosis factor alpha; SFN, Silk fibroin nanoparticles; PPh, polyphenols; SFN-CUR, SFN-curcumin loaded; SFN-Q, SFN-quercetin loaded; SFN-RES, SFN-resveratrol loaded; CUR, curcumin; Q, quercetin; RES, resveratrol; N.S., not significant.

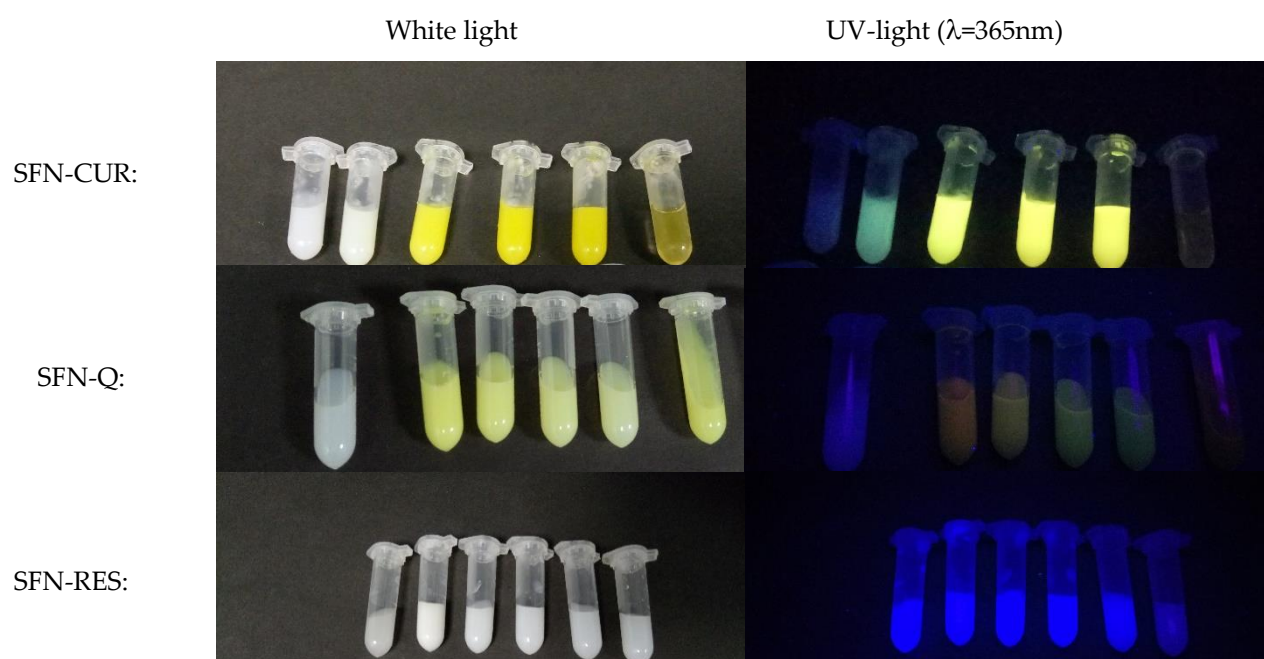

**Figure S1.** Photographs showing the effect of SFN/PPh ratio in the PLC of CUR, Q and RES under white light and UV-light ( $\lambda=365\text{nm}$ ). From left to right on each picture: SFN, PPh/SFN ratio 1:32, PPh/SFN ratio 1:16, PPh/SFN ratio 1:8, PPh/SFN ratio 1:4 and PPh.

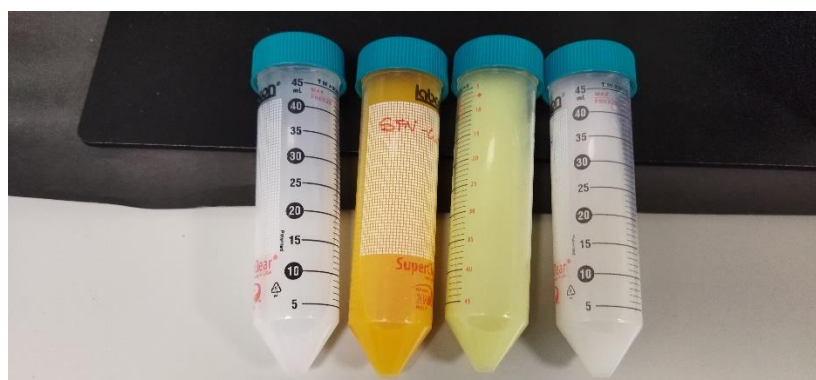

**Figure S2.** Photograph of the SFN-PPh stocks suspensions at  $10 \text{ mg}\cdot\text{mL}^{-1}$  used for cell culture tests. From left to right in the picture: SFN, SFN-CUR, SFN-Q and SFN-RES.

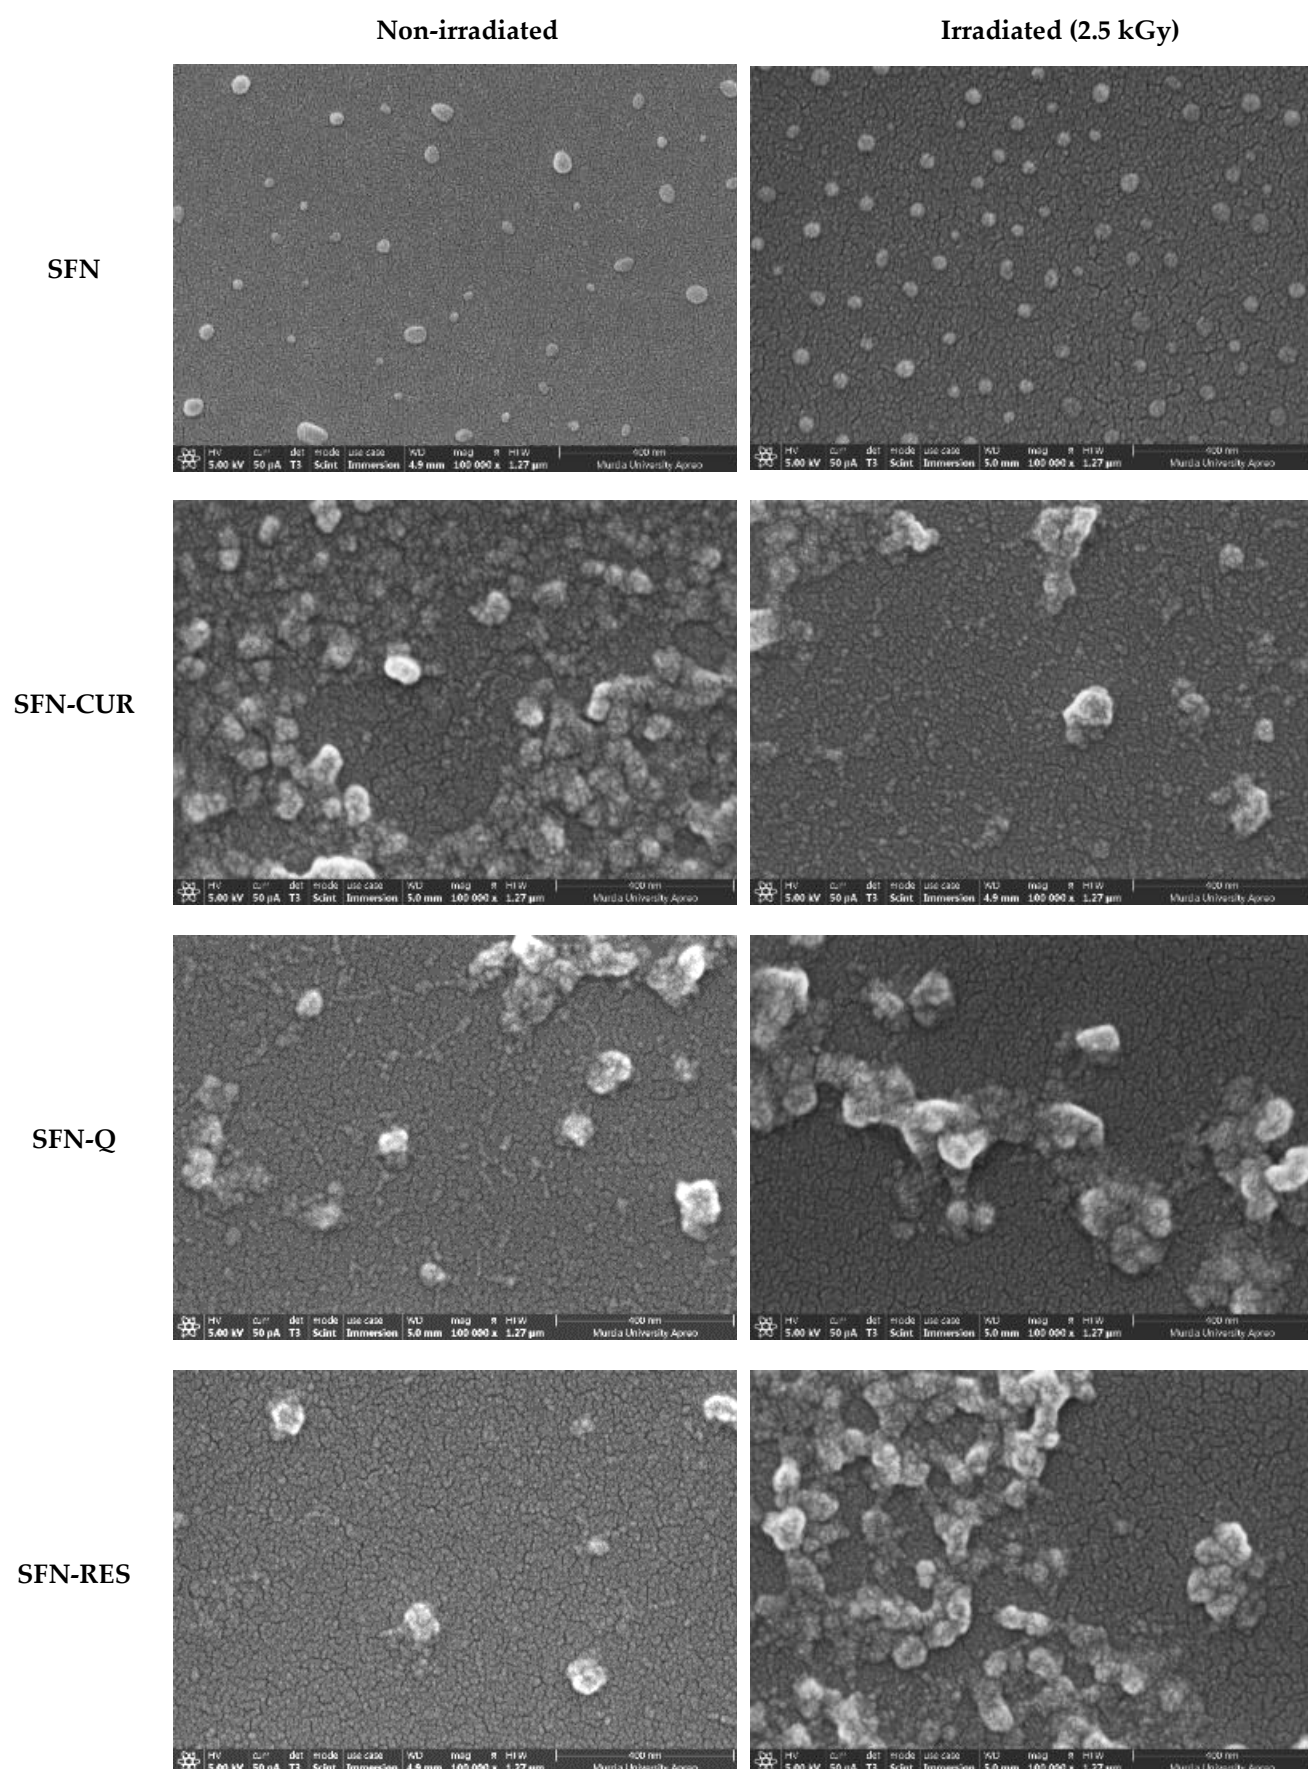

Figure S3. FESEM images of the nanoparticles showing changes during sterilization by gamma irradiation. Scale bar= 400 nm.

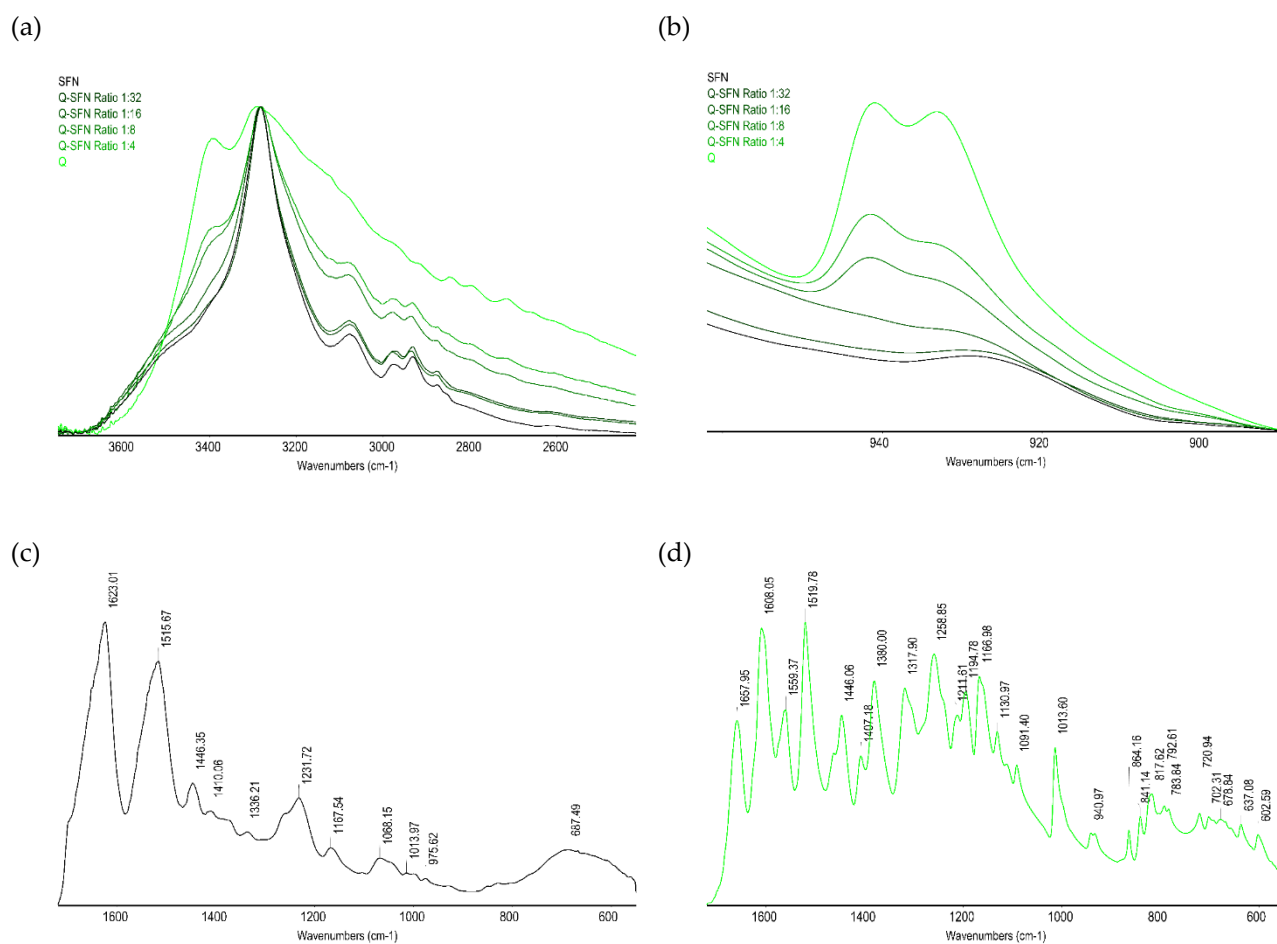

**Figure S4.** ATR-FTIR Spectra of the prepared SFN-Q at different Q/SFN ratios: (a) Magnification of the region 3600–2600  $\text{cm}^{-1}$  (b) Magnification of the region 950–900  $\text{cm}^{-1}$ . (c) Peak resolution of the quercetin spectrum in the region 1600–600  $\text{cm}^{-1}$ . (d) Peak resolution of the SFN spectrum in the region 1600–600  $\text{cm}^{-1}$ .
